# Supplementary material
Source: MDPI journal article supplement (https://www.mdpi.com/2073-4395/12/11/2903)
Supplement: s1 [file s1]

## Supplementary File:

### Life table analysis

The  $l_x$  and  $m_x$  were estimated by eq. 1 and 2:

$$l_x = \sum_{j=1}^k s_{xj} \quad (1)$$

$$m_x = \frac{\sum_{j=1}^k s_{xj} f_{xj}}{\sum_{j=1}^k s_{xj}} \quad (2)$$

where  $s_{xj}$  shows the probability of a newly-born larvae surviving to age  $x$  and stage  $j$ .  $k$  shows stages number and  $f_{xj}$  is the age-stage specific fecundity of the individual at age  $x$  and stage  $j$ .

The  $O_d$  represents the number of days that females laid eggs and was estimated by eq. 3:

$$O_d = \frac{\sum_{x=1}^{N_f} D_x}{N_f} \quad (3)$$

Where  $N_f$  shows the number of female adults and  $D_x$  represent the number of days that a female produced offspring.

The  $r$  shows population growth rate as the time approaches infinity and population reaches the stable age-stage distribution. The population would rise at a rate of per unit of time. The  $r$  was calculated using the interactive bisection method and corrected with the Euler–Lotka equation with age indexed from 0 [1]:

$$\sum_{x=0}^{\infty} e^{-r(x+1)} l_x m_x = 1 \quad (4)$$

The  $\lambda$  represents the rate of population growth as the time approaches infinity, and the population reaches the stable age stage distribution. The population size will increase at the rate of  $\lambda$  per time unit. The  $\lambda$  was estimated by eq. 5:

$$\lambda = e^r \quad (5)$$

The  $R_0$  shows the cumulative number of eggs laid by a single female throughout her life. The  $R_0$  was calculated using eq. 6:

$$R_0 = \sum_{x=0}^{\infty} l_x m_x \quad (6)$$

The  $T$  represents the period needed by a population to increase to  $R_0$ -fold its current size when the stable rate of increase is reached. The  $T$  was estimated by eq. 7:

$$T = \frac{\ln R_0}{r} \quad (7)$$

The life expectancy ( $e_{xj}$ ) shows the expected duration that an individual of age  $x$  and stage  $j$  will survive. The  $e_{xj}$  was estimated according to Chi and Su [2] using eq. 8:

$$e_{xj} = \sum_{i=x}^{\infty} \sum_{y=j}^k s'_{iy} \quad (8)$$

Where  $s'_{iy}$  represents the probability that an individual of age  $x$  and stage  $j$  will survive to age  $i$  and stage  $y$  by assuming  $s' = 1$ .

$v_{xj}$  shows the dedication to future offspring at age  $x$  and stage  $j$ . The  $v_{xj}$  was estimated by eq. 9 [3,4]:

$$v_{xj} = \frac{e^{r(x+1)}}{s_{xj}} \sum_{i=x}^{\infty} e^{-r(i+1)} \sum_{y=j}^{\beta} s'_{iy} f_{iy} \quad (9)$$

## References

1. Goodman, D. Optimal life histories, optimal notation, and the value of reproductive value. *The American Naturalist* **1982**, *119*, 803-823.
2. Chi, H.; Su, H.-Y. Age-stage, two-sex life tables of *Aphidius gifuensis* (Ashmead)(Hymenoptera: Braconidae) and its host *Myzus persicae* (Sulzer) (Homoptera: Aphididae) with mathematical proof of the relationship between female fecundity and the net reproductive rate. *Environ Entomol* **2006**, *35*, 10-21.
3. Tuan, S.J.; Lee, C.C.; Chi, H. Population and damage projection of *Spodoptera litura* (F.) on peanuts (*Arachis hypogaea* L.) under different conditions using the age-stage, two-sex life table. *Pest Manag Sci* **2014**, *70*, 805-813.
4. Tuan, S.J.; Lee, C.C.; Chi, H. Erratum: Population and damage projection of *Spodoptera litura* (F.) on peanuts (*Arachis hypogaea* L.) under different conditions using the age-stage, two-sex life table. *Pest Manag. Sci.* **2014**, *70*, 1936.
